# Supplementary material for: An iontronic flexible pressure sensor based on a multistage gradient micro-dome structure with a broad sensing range for wearable devices
Source: Royal Society of Chemistry journal article supplement (doi:10.1039/d4tc03538k), 2024-01-01
Supplement: d4tc03538k1.pdf [file d4tc03538k1.pdf]

## *Supplementary Information*

### **Iontronic flexible pressure sensor based on multistage gradient micro-dome structure with broad sensing range for wearable devices**

Hongwei Zhang<sup>a</sup>, Dong Yang<sup>a</sup>, Qiang Long<sup>c</sup>, Zihao Yan<sup>b</sup>, Huishan Zhang<sup>a</sup>, Tianxu Zhang<sup>b</sup>, Yanbo He<sup>b</sup>, Xin He<sup>b</sup>, Weiqiang Hong<sup>b</sup>, Yunong Zhao<sup>b\*</sup>, Xiaohui Guo<sup>a,b\*</sup>

*<sup>a</sup> Key Laboratory of Intelligent Computing and Signal Processing of the Ministry of Education, College of Electronic and Information Engineering, Anhui University, Hefei, 230601, China*

*<sup>b</sup> Key Laboratory of Intelligent Computing and Signal Processing of Ministry of Education, School of Integrated Circuits, Anhui University, Hefei, 230601, China*

*<sup>c</sup> Huadong Photo-Electron IC Institute, Bengbu Anhui, 233030, China*

Corresponding Authors: Xiaohui Guo: [guoxh@ahu.edu.cn](mailto:guoxh@ahu.edu.cn); Yunong Zhao: [zhaoyun@ahu.edu.cn](mailto:zhaoyun@ahu.edu.cn).

## Processing of AgNWs stock solutions

First, an appropriate amount of AgNWs suspension stock solution was taken and diluted in a solvent mixture of water and ethanol at a volume ratio of 1:1, and the volume ratio of the suspension to the solvent mixture was 1:10. Second, in order to make the adhesion between AgNWs and the substrate material stronger, Hydroxypropyl Methyl Mellulose (HPMC), which accounted for about 0.5% of the total mass, was also added to the dilution solution. Finally, the solution was heated in a water bath at 50 °C for 30 min. After obtaining the AgNWs solution, an appropriate amount was taken into a spray gun and repeatedly sprayed on the surface of the flexible substrate to obtain a flexible electrode, as shown in Fig. S1.

## Supplementary Figures

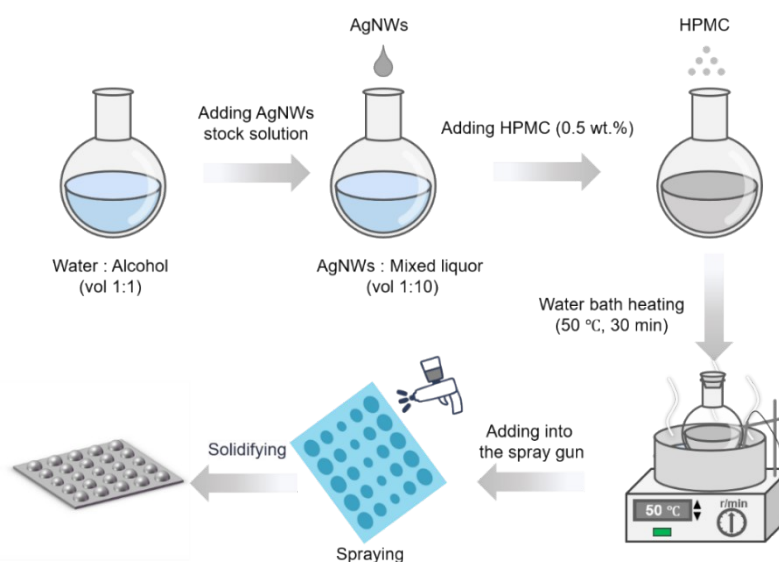

**Fig. S1** Steps for the treatment of AgNWs stock solutions and the fabrication of AgNWs electrodes.

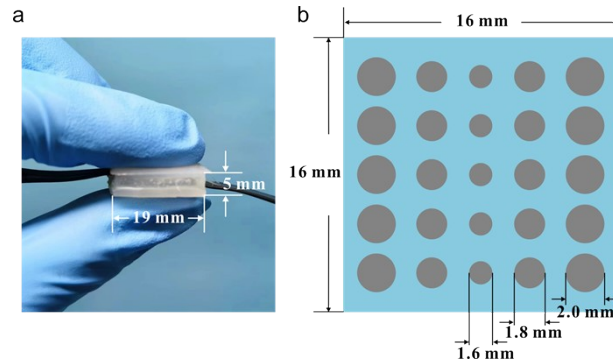

**Fig. S2** (a) Dimension diagram of the packaged sensor. (b) Top view schematic of the structural electrode.

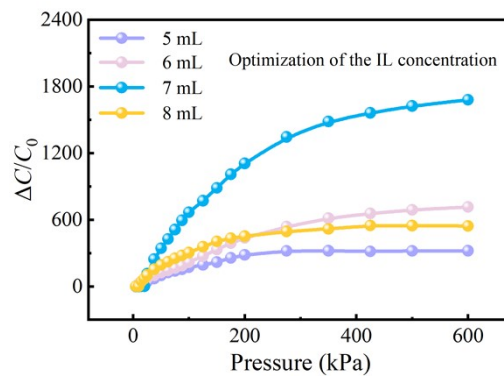

**Fig. S3** Capacitance pressure profiles of the sensors under keeping the amount of PVA and deionized water constant at 2.2 g and 15.4 g, respectively, while varying the amount of IL (5 ml, 6 ml, 7 ml, 8 ml).

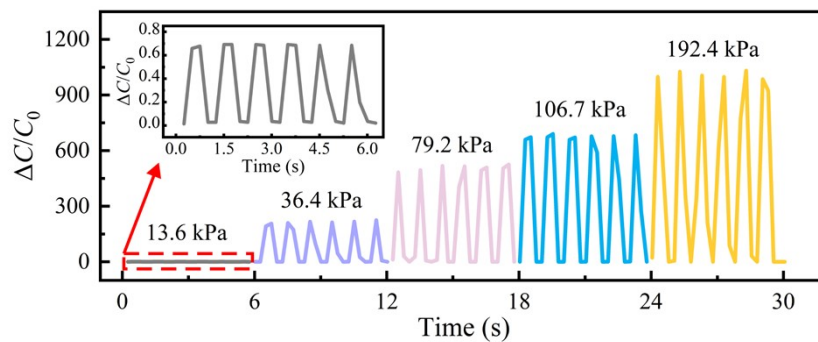

**Fig. S4** The relative capacitive response of the sensor at different pressures.

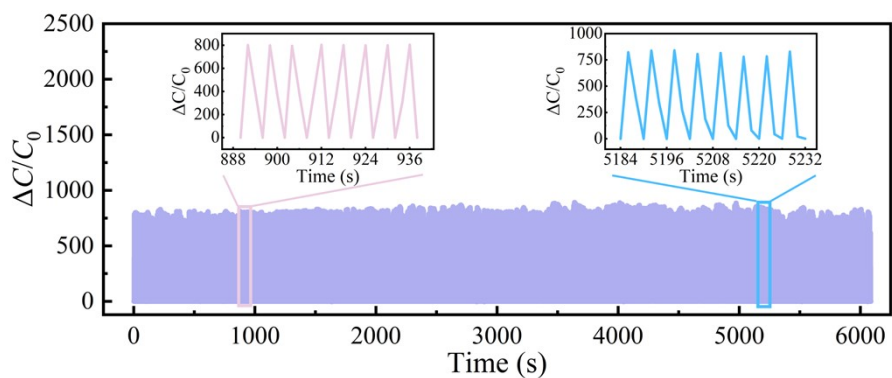

**Fig. S5** The sensor was tested in 1000 compression-release cycles at a peak pressure of 136.8 kPa.

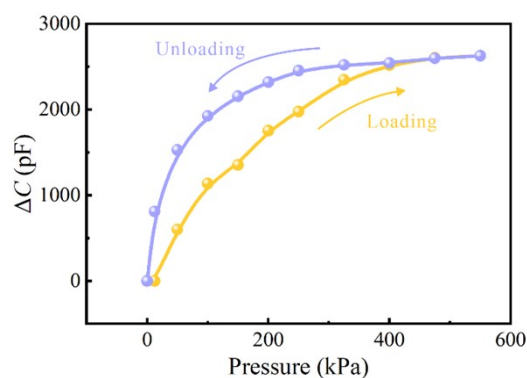

**Fig. S6** The hysteresis characteristics of the sensor.

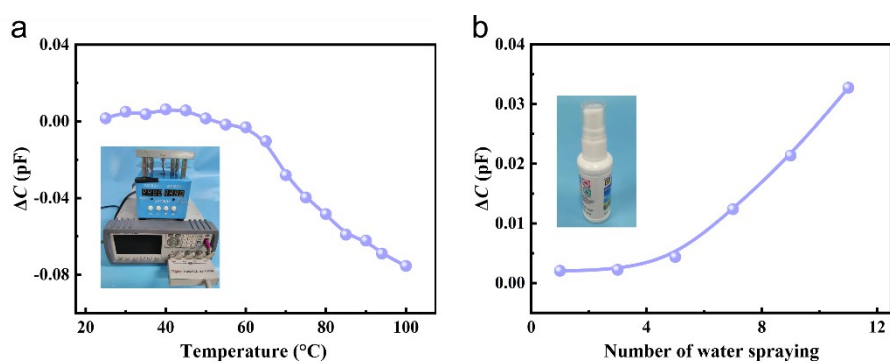

**Fig. S7** (a) Plot of the capacitance change of the sensor when the ambient temperature is increased from room temperature (25 °C) to 100 °C. (b) Plot of the capacitance change of the sensor as the number of water sprays from the spray unit increases.

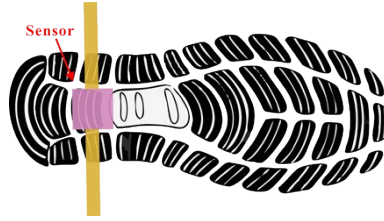

**Fig. S8** Top view schematic of the sensor in the foot position.

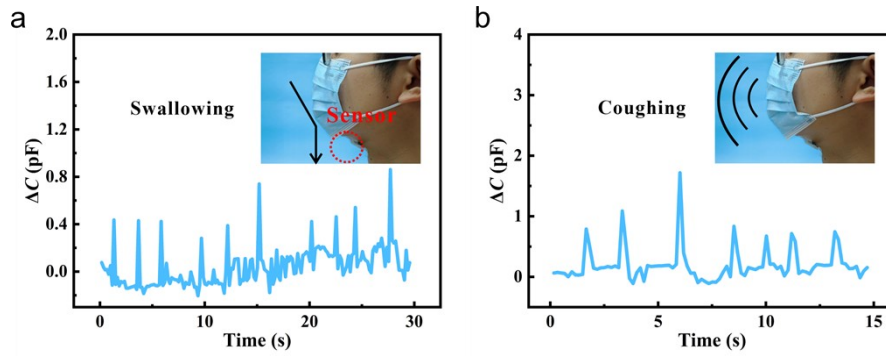

**Fig. S9** Capacitance changes in swallowing (a), and coughing (b).

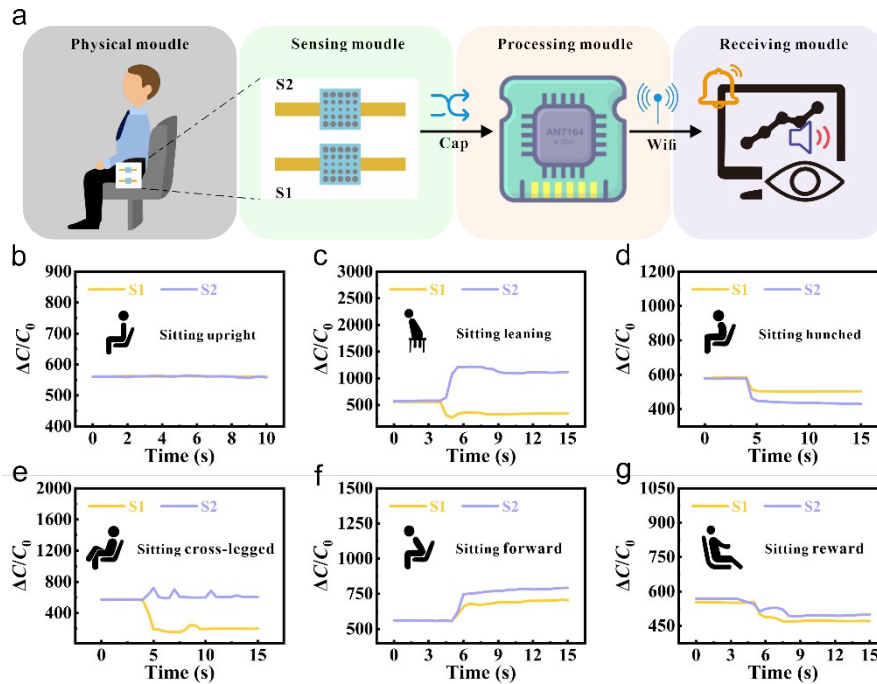

**Fig. S10** The  $1 \times 2$  sensor array enables the detection of different sitting postures. (a) Schematic diagram of sensor placement position. Capacitance changes in upright sitting (b), leaning sitting (c), hunched sitting (d), cross-legged sitting (e), forward sitting (f),

and reward sitting (g).

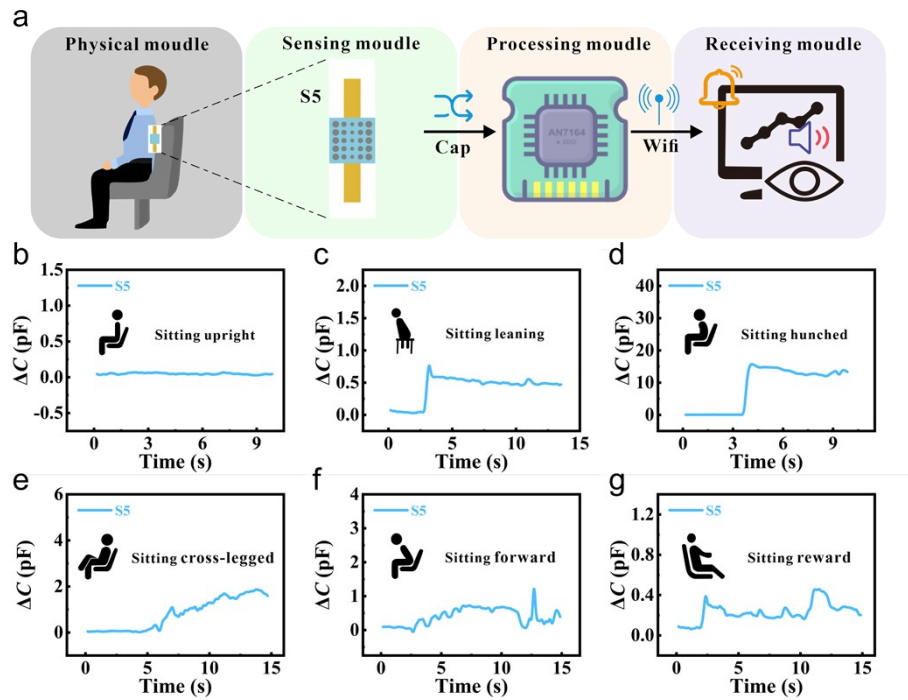

**Fig. S11** The sensor at the spine detects different sitting postures. (a) Wireless sitting position detection system. Capacitance changes in upright sitting (b), leaning sitting (c), hunched sitting (d), cross-legged sitting (e), forward sitting (f), and reward sitting (g).
